# Supplementary material for: Nucleoside-lipid-based nanocarriers for methylene blue delivery: potential application as anti-malarial drug
Source: Royal Society of Chemistry journal article supplement (doi:10.1039/c9ra02576f), 2019-01-01
Supplement: c9ra02576f1.pdf [file c9ra02576f1.pdf]

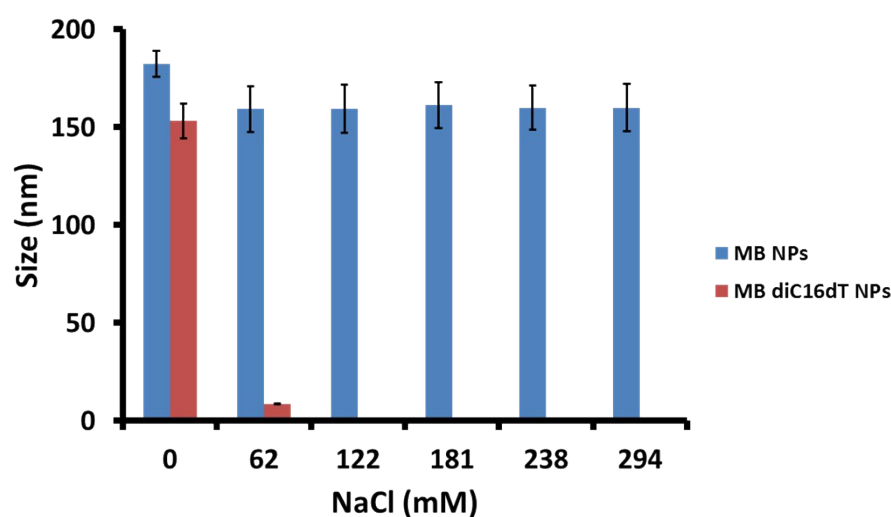

**Figure S1:** Size evolution of MB/diC16dT NPs (red) and MB-NPs (blue) at different concentrations of NaCl. Error bars represent standard deviation of three independent experiments.

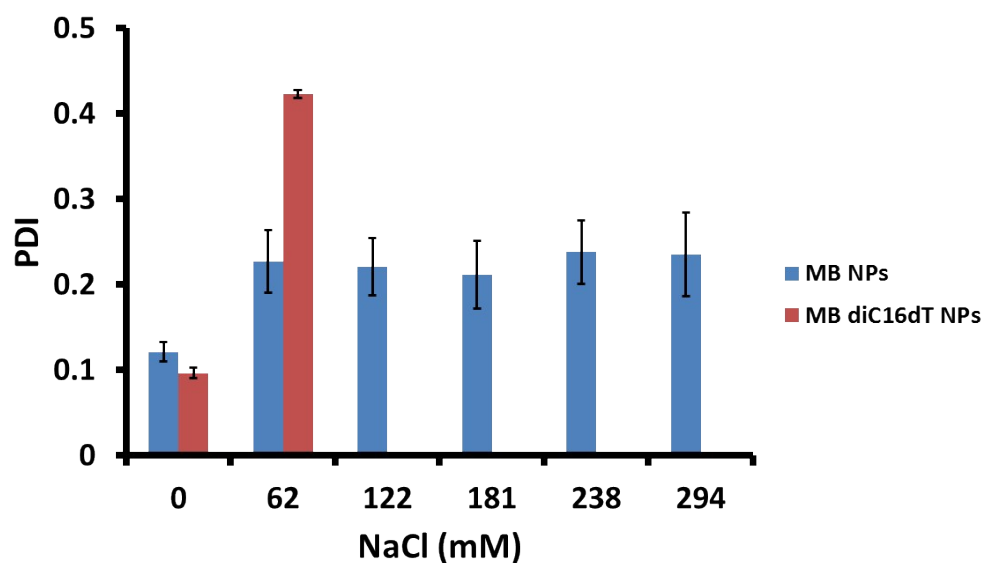

**Figure S2:** PDI evolution of MB/diC16dT (red) NPs and MB-NPs (blue) at different concentrations of NaCl. Error bars represent standard deviation of three independent experiments.

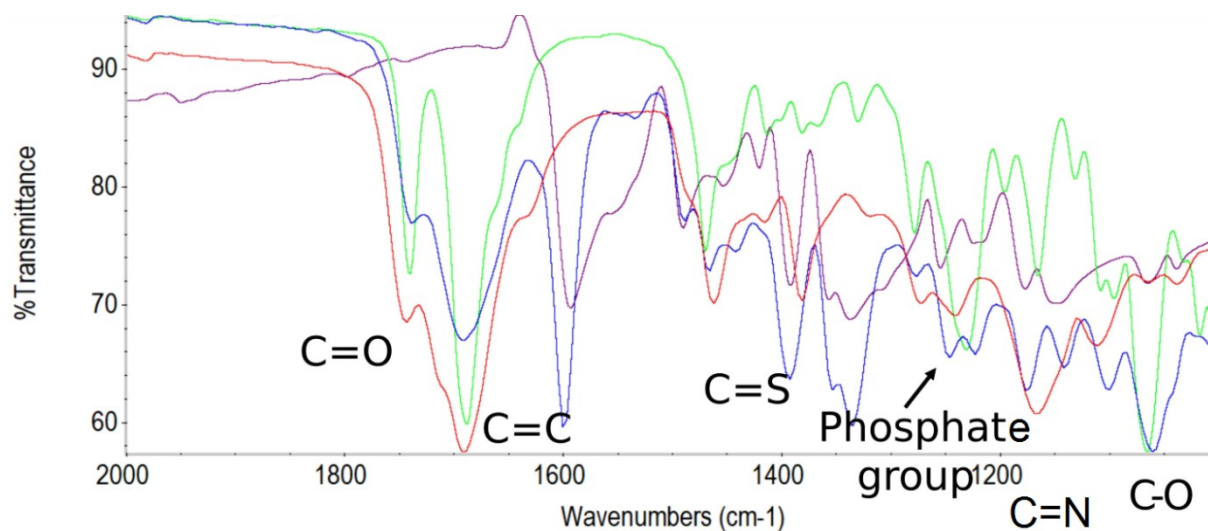

**Figure S3:** Enhancement of 2000-1000 Wavenumber region of Fourier-Transform spectra Infrared spectra of MB (violet), diC16dT (green), DOTAU (red) and MB-NPs (blue).
